# Supplementary material for: Control of self-aldol condensation by pressure manipulation under compressed CO2Electronic supplementary information (ESI) available: aldol reactions of aldehyde 1b in the presence of MgO catalyst. See http://www.rsc.org/suppdata/cc/b3/b307647b/
Source: Royal Society of Chemistry journal article supplement (doi:10.1039/b307647b), 2003-01-01
Supplement: b307647b.pdf [file b307647b.pdf]

## Supplementary Information

Control of the self-aldol condensation by pressure manipulation under compressed CO<sub>2</sub>

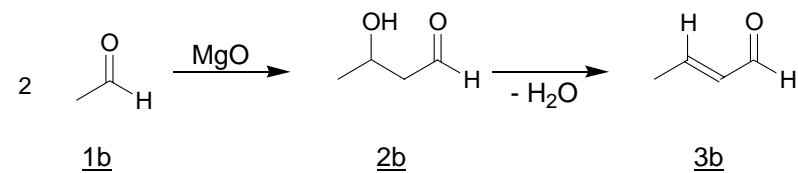

**Table 2** Aldol reactions of acetaldehyde **1b** in the presence of MgO catalyst.

| Run | Substrate    | Pressure<br>/ MPa | Condition | Conv. / % <sup>a</sup> | Yield of <b>2b</b><br>/ % | Selectivity to <b>2b</b><br>/ % | Yield of <b>3b</b><br>/ % | Selectivity to <b>3b</b><br>/ % |
|-----|--------------|-------------------|-----------|------------------------|---------------------------|---------------------------------|---------------------------|---------------------------------|
| 1   |              | 5                 | MgO       | 70                     | 51                        | 73                              | 19                        | 27                              |
| 2   | acetaldehyde | 8                 | MgO       | 58                     | 24                        | 40                              | 35                        | 60                              |
| 3   |              | 12                | MgO       | 23                     | 0                         | 0                               | 22                        | 96                              |

K. Matui, H. Kawanami,\* Y. Ikushima, H. Hayashi
